# Supplementary material
Source: PubMed Central journal article supplement (PMC2577761)
Supplement: NIHMS2579-supplement-Fig_S1.pdf [file NIHMS2579-supplement-Fig_S1.pdf]

| Gene name                    | Forward primer (F)<br>Reverse primer (R)                 | Seq. coverage<br>relative to TSS | Annealing<br>temp. (°C) |
|------------------------------|----------------------------------------------------------|----------------------------------|-------------------------|
| <b>ChIP primers</b>          |                                                          |                                  |                         |
| <i>GAPDH</i>                 | F: CCCAACTTTCCCGCCTCT<br>R: CAGCCGCCTGGTTCAACTG          | -402 to -109                     | 52                      |
| <i>Lamin B1</i>              | F: GCAAGCCGTGCATTTGGAAC<br>R: CTGAGAAAGGCGGGAAGGA        | -91 to +163                      | 52                      |
| <i>Oct4</i>                  | F: GCACTGAGGTCCTGGAGGGGCGC<br>R: CGAAATCCGAAGCCAGGTGTCCC | -251 to +29                      | 52                      |
| <i>Nanog<br/>promoter 1</i>  | F: GTCTAAGGTGATAGAGCCTTC<br>R: GAGGTGGACTGGAAAAAAGG      | -89 to +115                      | 52                      |
| <i>Nanog<br/>promoter 2</i>  | F: GCAGGCAACTCACTTTATCCC<br>R: GTCTCCGTGTGAGGCATCTCAG    | +1 to +297                       | 58                      |
| <i>Cripto</i>                | F: CAAGGTCAAACGTCCAAGG<br>R: GGAAAAGAGGCGTTAGCATC        | -33 to +164                      | 52                      |
| <b>Real Time PCR primers</b> |                                                          |                                  |                         |
| <i>Human Lamin B2</i>        | F: GGGCGCATCTTACCAAAG<br>R: GTCTGTCGCCAGCATTCC           |                                  | 60                      |
| <i>Human Nanog</i>           | F: TAATACAGCAGACCACTAGG<br>R: CTCCAGGAAGATCCAATAG        |                                  | 58                      |
| <i>Human Oct4</i>            | F: GGCCACACGTAGGTTCTTG<br>R: CATCGGCCTGTGTATATCCC        |                                  | 60                      |
| <i>Human Lamin A</i>         | F: GCTTCCAGGAAACTCCAC<br>R: AGGCACCATGTCACAGG            |                                  | 60                      |
| <i>Human Sox2</i>            | F: CCATCACCCACAGCAAATG<br>R: AGTCCCCCAAAAAGAAGTCC        |                                  | 60                      |
| <i>Human c-Myc</i>           | F: GTGCGTAAGGAAAAGTAAGG<br>R: AAGACTCAGCCAAGGTTG         |                                  | 60                      |
| <i>Human Klf4</i>            | F: CTGTTATGCACTGTGGTT<br>R: GTATGCAAATACAAACTCC          |                                  | 60                      |
| <i>Mouse Lamin B2</i>        | F: GGCAGCTTCCTTTACTGAG<br>R: CCAGCCATAACTATCCAGG         |                                  | 60                      |
| <i>Mouse Nanog</i>           | F: TCTTCCTGGTCCCCACAGTTT<br>R: GCAAGAATAGTTCTCGGGATGAA   |                                  | 60                      |
| <i>Mouse Oct4</i>            | F: GAGGATCACTTGGGGTACA<br>R: CTCGAAGCGACAGATGGTG         |                                  | 60                      |
| <i>Mouse Lamin A</i>         | F: AGAGAGGATGACTGAGAAGG<br>R: GTATCCCACTTGACATTGC        |                                  | 60                      |
| <i>Mouse Sox2</i>            | F: AGGGCTGGGAGAAAGAAGAG<br>R: CTGGCGGAGAATAGTTGGG        |                                  | 60                      |
| <i>Mouse c-Myc</i>           | F: AGACACGGAGGAAAACGAC<br>R: TGCTTGAATGGACAGGATG         |                                  | 60                      |
| <i>Mouse Klf4</i>            | F: ACCCCTCTCTTCTTCCGG<br>R: CGCAGTGTCTTCTCCCTTC          |                                  | 60                      |
