# Supplementary material
Source: PubMed Central journal article supplement (PMC2577761)
Supplement: NIHMS2579-supplement-Fig_S2.pdf [file NIHMS2579-supplement-Fig_S2.pdf]

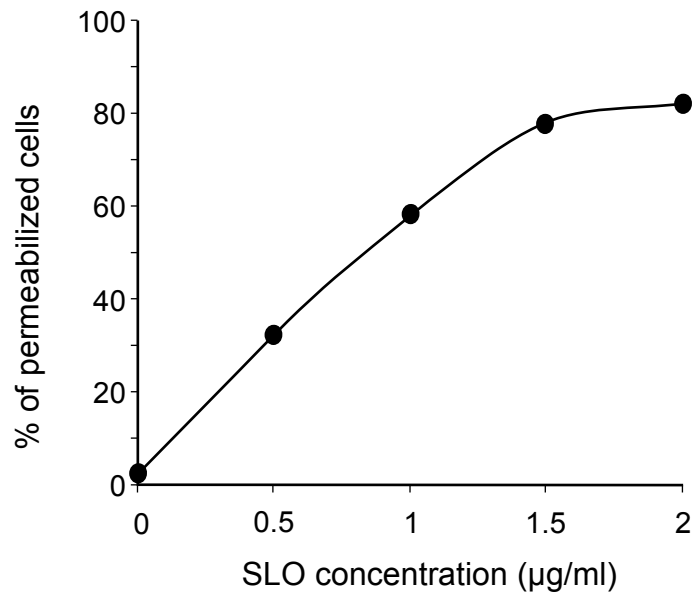

Supplementary Figure S2. SLO titration to optimize the efficiency of permeabilization of 293T cells.

293T cells were incubated for 50 min in buffer containing different concentrations of pre-activated SLO. After incubation, permeabilization was assessed by monitoring uptake of Trypan Blue.
