# Supplementary material
Source: PubMed Central journal article supplement (PMC2577761)
Supplement: NIHMS2579-supplement-Fig_S3.pdf [file NIHMS2579-supplement-Fig_S3.pdf]

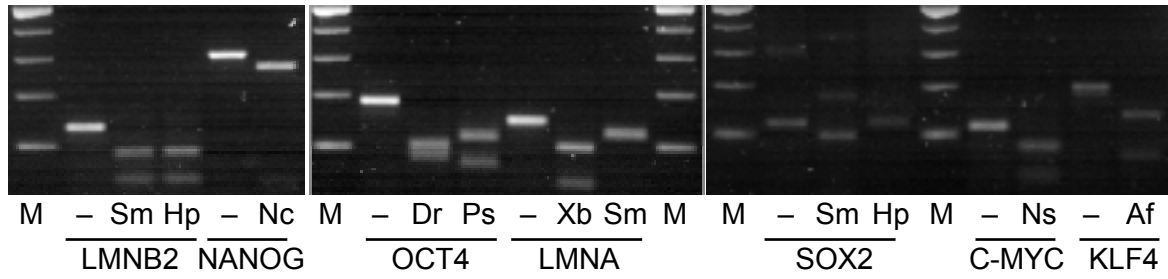

Supplementary Figure S3. Verification of PCR products by restriction digestion.

PCR products generated by the human-specific primers in human NCCIT cells were analysed by agarose gel electrophoresis, plus or minus restriction enzyme digestion. M, molecular weight markers; -, no digestion; Sm, Smal; Hp, HpaI; Dr, DraI; Ps, PstI; Xb, XbaI; Ns, NsiI; Af, AflII.
